# Supplementary material
Source: PubMed Central journal article supplement (PMC3074626)
Supplement: supp_00318.2010_33457_1_art_file_824988_lbkzpq.pdf [file supp_00318.2010_33457_1_art_file_824988_lbkzpq.pdf]

**Supplemental Figure 1.** Steady-state currents from mouse taste cells during whole cell patch clamp recording in the presence of insulin (5 nM) and insulin (5nM) + benzamil (10 $\mu$ M a highly specific ENaC blocker).

**Supplemental Figure 2.** RT-PCR experiments reveals the presence of SGK1 in fungiform and circumvallate taste buds. + RT for mouse kidney and taste are shown for SGK1. – RT and negative control (-) lanes represent those in which cDNA was absent from the PCR reaction.

**Supplemental Figure 3.** Latency to the first lick for all NaCl solutions. Bar graph of mean  $\pm$  SEM for latency in seconds for both control and insulin treated groups. Student t-test shows no statistical significance between the groups ( $p=0.5484$ ).
