# Supplementary material
Source: PubMed Central journal article supplement (PMC3074626)

A

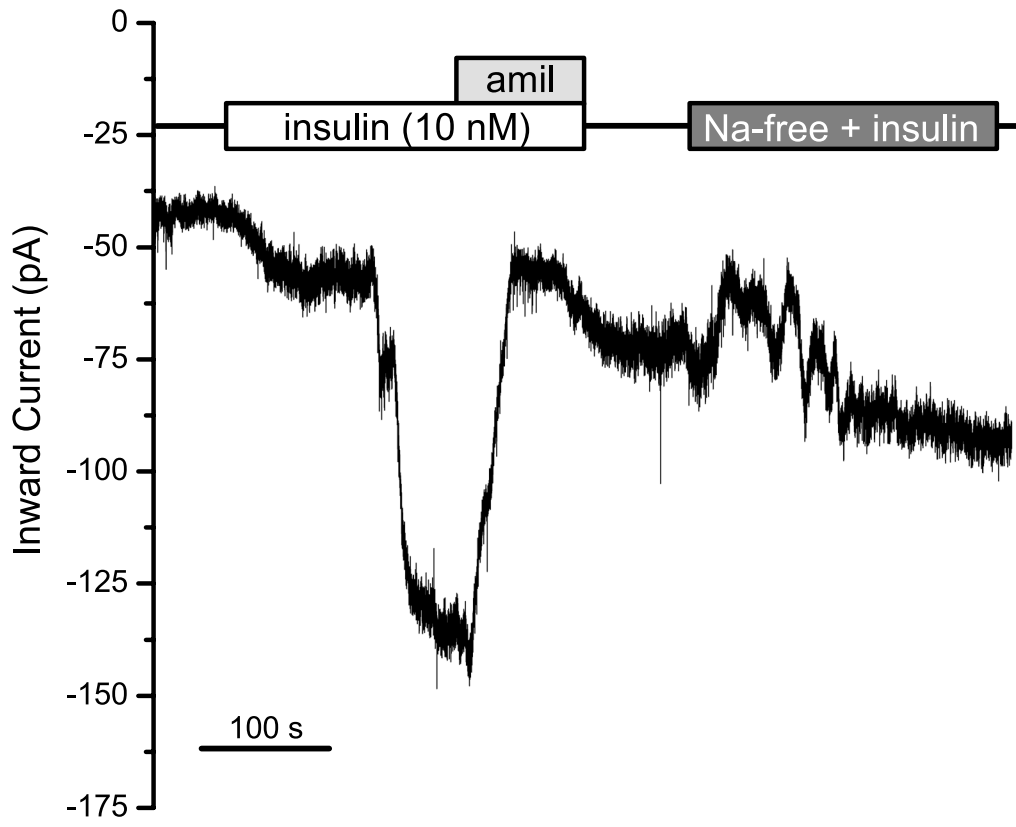

B

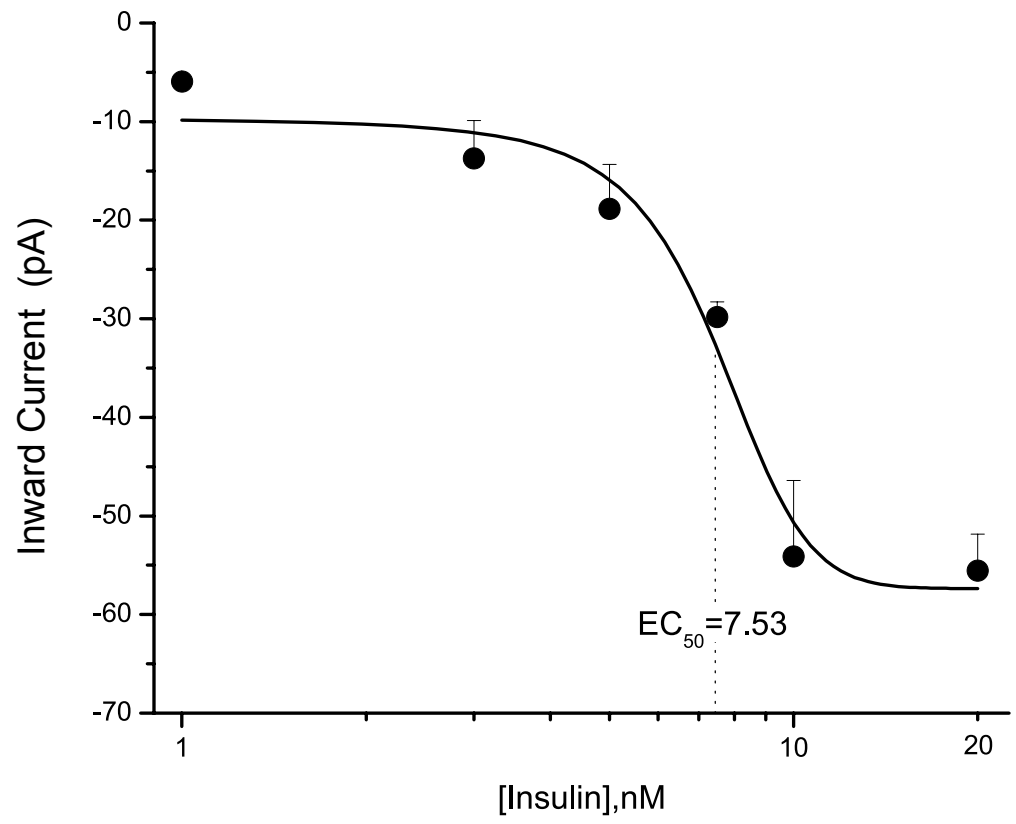

Supplement: supp_00318.2010_Revised_Fig_1.pdf [file supp_00318.2010_Revised_Fig_1.pdf]

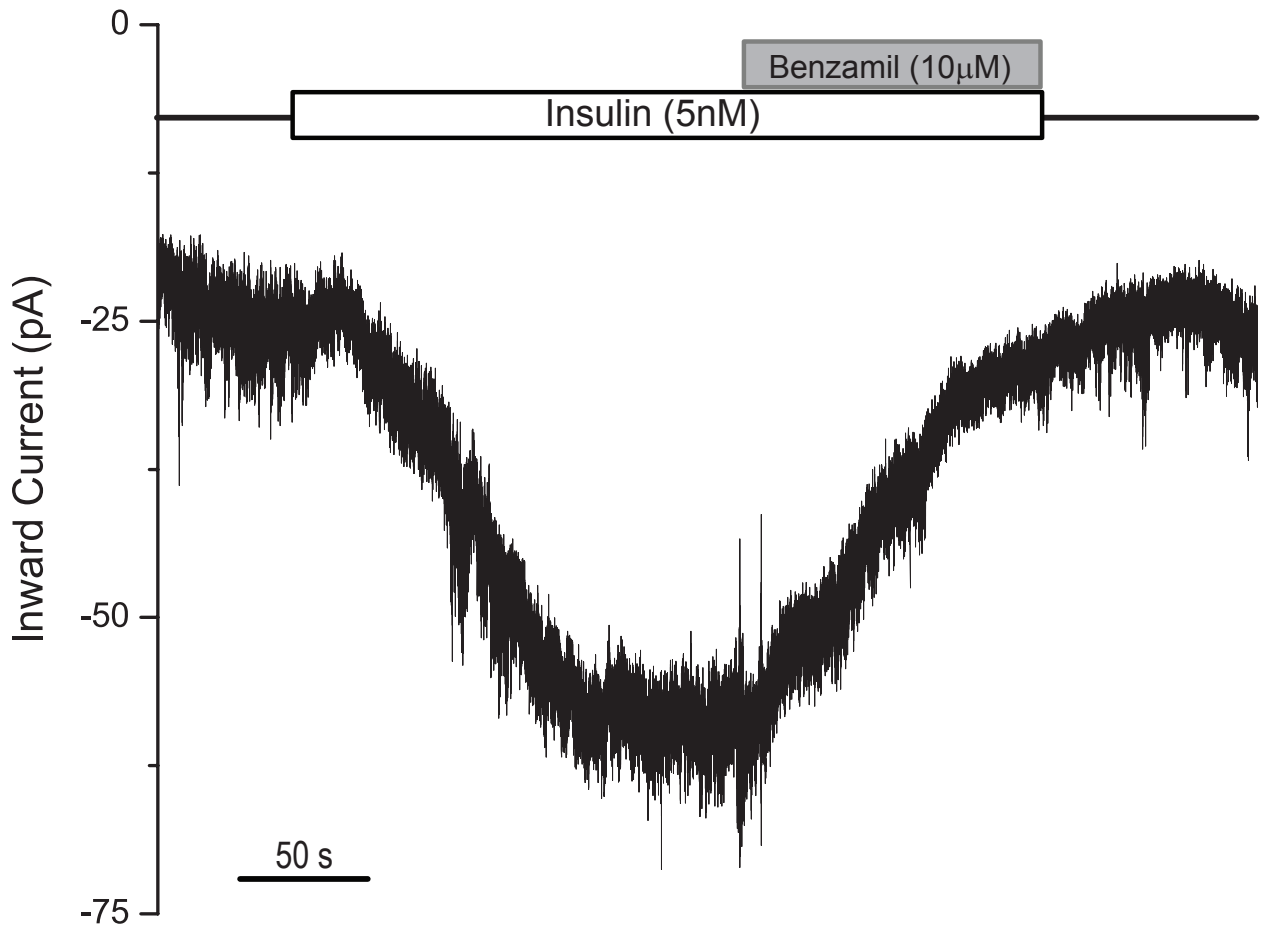

Supplement: supp_00318.2010_figS1.pdf [file supp_00318.2010_figS1.pdf]

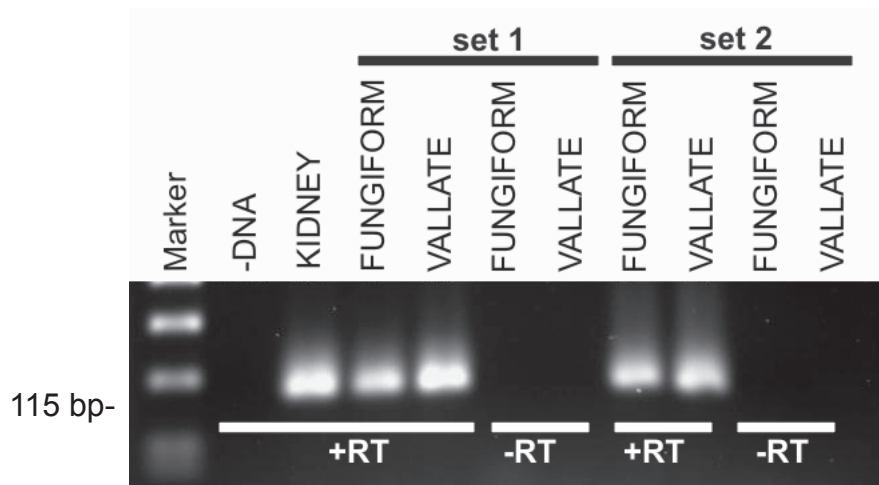

Supplement: supp_00318.2010_figS2.pdf [file supp_00318.2010_figS2.pdf]

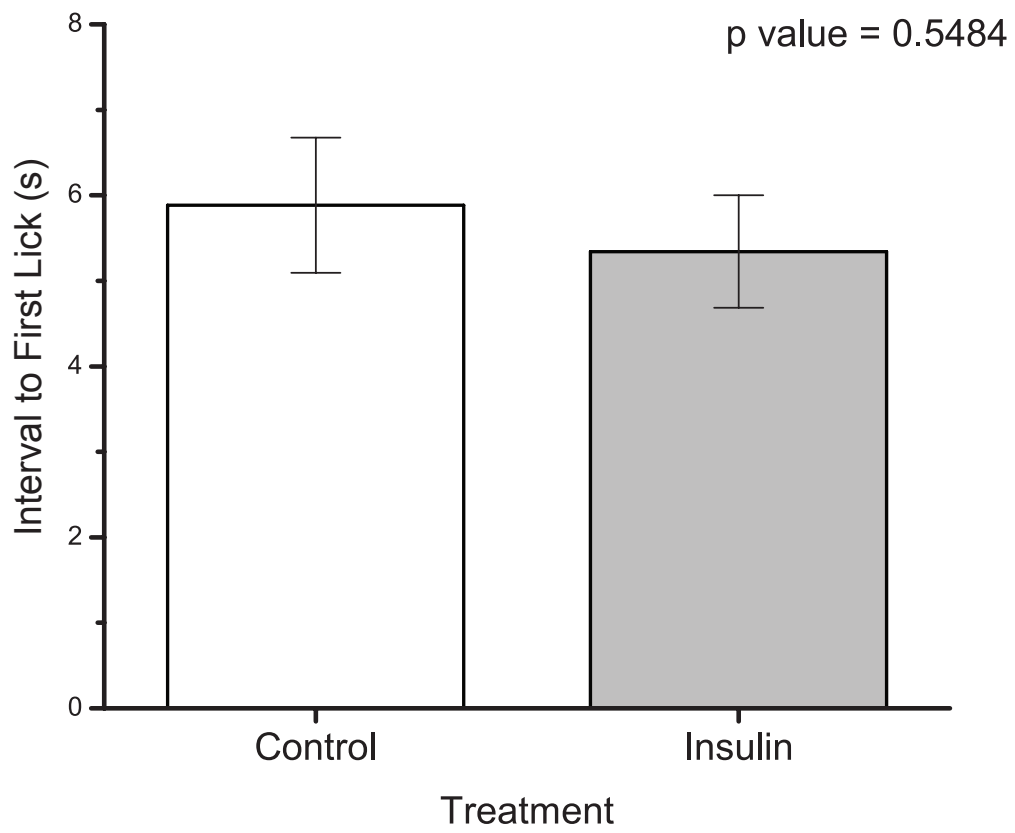

Supplement: supp_00318.2010_figS3.pdf [file supp_00318.2010_figS3.pdf]
